# Supplementary material for: Invasion of sorghum in the Americas by a new sugarcane aphid (Melanaphis sacchari) superclone
Source: PLoS One. 2018 Apr 25;13(4):e0196124. doi: 10.1371/journal.pone.0196124 (PMC5919042; doi:10.1371/journal.pone.0196124)
Supplement: S1 Table — (XLSX) [file pone.0196124.s003.xlsx]

## Sheet: Feuil1
sample code	voucher code	state	administrative entity	host plant	host plant common name	sampling date	Collected by	note
GLP-06	SNIB00215_01	Guadeloupe	Département de Guadeloupe	Saccharum officinarum x spontaneum	sugarcane	2017-01-20	Boisne-Noc R.; Grossard F.
GLP-07	SNIB00216_01	Guadeloupe	Département de Guadeloupe	Saccharum officinarum x spontaneum	sugarcane	2017-01-20	Boisne-Noc R.; Grossard F.
GLP-08	SNIB00217_01	Guadeloupe	Département de Guadeloupe	Saccharum officinarum x spontaneum	sugarcane	2017-01-20	Boisne-Noc R.; Grossard F.
GLP-09	SNIB00218_01	Guadeloupe	Département de Guadeloupe	Saccharum officinarum x spontaneum	sugarcane	2017-01-20	Boisne-Noc R.; Grossard F.
HTI-01	SNIB00211_01	Haiti	Département de l'Ouest	Sorghum bicolor	grain sorghum	2016-09-01	Lazoret G.; Pressoir G.
HTI-02	SNIB00212_01	Haiti	Département de l'Ouest	Sorghum bicolor	grain sorghum	2016-09-01	Lazoret G.; Pressoir G.
HTI-03	SNIB00213_01	Haiti	Département de l'Ouest	Sorghum bicolor	grain sorghum	2016-09-01	Lazoret G.; Pressoir G.
HTI-04	SNIB00214_01	Haiti	Département de l'Ouest	Sorghum bicolor	grain sorghum	2016-09-01	Lazoret G.; Pressoir G.
MEX-01	SNIB00125_01	Mexico	Guanajuato State, Irapuato County	Zea mays	maize	2015-08-20	Villanueva R.
MEX-02	SNIB00127_01	Mexico	Guanajuato State, Irapuato County	Sorghum bicolor	grain sorghum	2015-08-20	Villanueva R.
PER-01	SNIB00206_01	Peru	Lima Region	Saccharum officinarum x spontaneum	sugarcane	2016-10-22	Villanueva R.
PRI-01	SNIB00227_01	Puerto Rico	Guayanilla Municipio	Sorghum bicolor	grain sorghum	2017-02-21	Cuevas H.
PRI-02	SNIB00228_01	Puerto Rico	Guayanilla Municipio	Sorghum bicolor	grain sorghum	2017-02-21	Cuevas H.
PRI-03	SNIB00229_01	Puerto Rico	Isabela Municipio	Sorghum bicolor	grain sorghum	2017-02-22	Cuevas H.
PRI-04	SNIB00230_01	Puerto Rico	Isabela Municipio	Sorghum bicolor	grain sorghum	2017-02-22	Cuevas H.
US-AL-01	SNIB00100_01	Alabama	Lee County	Sorghum bicolor	grain sorghum	2014-08-15	Flanders K.
US-AL-02	SNIB00103_01	Alabama	Marengo County	Sorghum bicolor	grain sorghum	2015-06-18	Flanders K.
US-AL-03	SNIB00106_01	Alabama	Elmore County	Sorghum halepense	Johnsongrass	2015-06-24	Flanders K.
US-AL-04	SNIB00109_01	Alabama	Macon County	Sorghum halepense	Johnsongrass	2015-06-15	Flanders K.
US-AL-05	SNIB00141_01	Alabama	Lee County	Saccharum officinarum x spontaneum	sugarcane	2014-08-15	Flanders K.
US-AL-06	SNIB00149_01	Alabama	Lee County	Saccharum officinarum x spontaneum	sugarcane	2014-08-15	Flanders K.
US-AL-07	SNIB00179_01	Alabama	Lee County	Sorghum bicolor	grain sorghum	2014-08-15	Flanders K.
US-AL-08	SNIB00188_01	Alabama	Lee County	Saccharum officinarum x spontaneum	sugarcane	2014-08-15
US-AL-09	SNIB00196_01	Alabama	Lee County	Sorghum bicolor	grain sorghum	2015-10-21	Pekarcik A.
US-AL-10	SNIB00197_01	Alabama	Elmore County	Sorghum halepense	Johnsongrass	2016-06-07	Flanders K.
US-AL-11	SNIB00198_01	Alabama	Lee County	Saccharum officinarum x spontaneum	sugarcane	2016-07-09	Jacobson A.
US-AR-03	SNIB00191_01	Arkansas	Jefferson County	Sorghum bicolor	grain sorghum	2014-08-14	Lorenz G.
US-AR-04	SNIB00189_01	Arkansas	Chicot County	Sorghum halepense	Johnsongrass	2014-09-03	Selter N.
US-CA-01	SNIB00204_01	California	Kern County	Sorghum bicolor	grain sorghum	2016-11-01	Haviland D.
US-CA-02	SNIB00205_01	California	Fresno County	Sorghum bicolor	grain sorghum	2016-11-03	Clark N.
US-FL-01	SNIB00142_01	Florida	Palm Beach County	Saccharum officinarum x spontaneum	sugarcane	2013-12-18
US-FL-02	SNIB00177_01	Florida	Palm Beach County	Saccharum officinarum x spontaneum	sugarcane	2013-12-18
US-FL-03	SNIB00201_01	Florida	Palm Beach County	Saccharum officinarum x spontaneum	sugarcane	2013-11-20	Miller G.
US-FL-04	SNIB00202_01	Florida	Palm Beach County	Sorghum bicolor	grain sorghum	2013-11-20	Miller G.
US-GA-01	SNIB00194_01	Georgia	Tift County	Sorghum halepense	Johnsongrass	2016-10-17	Ni X.
US-GA-02	SNIB00195_01	Georgia	Tift County	Sorghum bicolor	grain sorghum	2016-10-17	Ni X.
US-LA-01	SNIB00007_01	Louisiana	Terrebonne Parish	Saccharum officinarum x spontaneum	sugarcane	2007-08-21	White B.	sample Lou1 in Nibouche et al. (2014) [16]
US-LA-02	SNIB00008_01	Louisiana	Assumption Parish	Saccharum officinarum x spontaneum	sugarcane	2007-08-21	White B.	sample Lou1 in Nibouche et al. (2014) [16]
US-LA-03	SNIB00009_01	Louisiana	Lafourche Parish	Saccharum officinarum x spontaneum	sugarcane	2007-08-21	White B.	sample Lou1 in Nibouche et al. (2014) [16]
US-LA-04	SNIB00010_01	Louisiana	Lafourche Parish	Sorghum halepense	Johnsongrass	2007-08-21	White B.	sample Lou1 in Nibouche et al. (2014) [16]
US-LA-05	SNIB00011_01	Louisiana	Saint Mary Parish	Saccharum officinarum x spontaneum	sugarcane	2007-09-06	White B.	sample Lou1 in Nibouche et al. (2014) [16]
US-LA-06	SNIB00012_01	Louisiana	Rapides Parish	Saccharum officinarum x spontaneum	sugarcane	2007-09-18	White B.	sample Lou1 in Nibouche et al. (2014) [16]
US-LA-07	SNIB00013_01	Louisiana	Terrebonne Parish	Saccharum officinarum x spontaneum	sugarcane	2007-10-17	White B.	sample Lou1 in Nibouche et al. (2014) [16]
US-LA-08	SNIB00014_01	Louisiana	Terrebonne Parish	Saccharum officinarum x spontaneum	sugarcane	2007-10-18	White B.	sample Lou1 in Nibouche et al. (2014) [16]
US-LA-09	SNIB00030_01	Louisiana	Terrebonne Parish	Saccharum officinarum x spontaneum	sugarcane	2007-08-21	White B.
US-LA-10	SNIB00031_01	Louisiana	Lafourche Parish	Saccharum officinarum x spontaneum	sugarcane	2007-08-21	White B.
US-LA-11	SNIB00032_01	Louisiana	Lafourche Parish	Saccharum officinarum x spontaneum	sugarcane	2007-08-21	White B.
US-LA-12	SNIB00033_01	Louisiana	Lafourche Parish	Saccharum officinarum x spontaneum	sugarcane	2007-08-21	White B.
US-LA-13	SNIB00034_01	Louisiana	Saint Mary Parish	Saccharum officinarum x spontaneum	sugarcane	2007-09-06	White B.
US-LA-14	SNIB00035_01	Louisiana	Saint Mary Parish	Saccharum officinarum x spontaneum	sugarcane	2007-09-06	White B.
US-LA-15	SNIB00036_01	Louisiana	Saint Mary Parish	Saccharum officinarum x spontaneum	sugarcane	2007-09-06	White B.
US-LA-16	SNIB00037_01	Louisiana	Rapides Parish	Saccharum officinarum x spontaneum	sugarcane	2007-09-18	White B.
US-LA-17	SNIB00038_01	Louisiana	Terrebonne Parish	Saccharum officinarum x spontaneum	sugarcane	2007-10-17	White B.
US-LA-18	SNIB00039_01	Louisiana	Terrebonne Parish	Saccharum officinarum x spontaneum	sugarcane	2007-10-17	White B.
US-LA-19	SNIB00040_01	Louisiana	Terrebonne Parish	Saccharum officinarum x spontaneum	sugarcane	2007-10-17	White B.
US-LA-20	SNIB00041_01	Louisiana	Terrebonne Parish	Saccharum officinarum x spontaneum	sugarcane	2007-10-17	White B.
US-LA-21	SNIB00042_01	Louisiana	Terrebonne Parish	Saccharum officinarum x spontaneum	sugarcane	2007-10-17	White B.
US-LA-22	SNIB00043_01	Louisiana	Terrebonne Parish	Saccharum officinarum x spontaneum	sugarcane	2007-10-17	White B.
US-LA-23	SNIB00044_01	Louisiana	Terrebonne Parish	Saccharum officinarum x spontaneum	sugarcane	2007-10-17	White B.
US-LA-24	SNIB00045_01	Louisiana	Terrebonne Parish	Saccharum officinarum x spontaneum	sugarcane	2007-10-17	White B.
US-LA-25	SNIB00046_01	Louisiana	Terrebonne Parish	Saccharum officinarum x spontaneum	sugarcane	2007-10-17	White B.
US-LA-26	SNIB00047_01	Louisiana	Terrebonne Parish	Saccharum officinarum x spontaneum	sugarcane	2007-10-17	White B.
US-LA-27	SNIB00048_01	Louisiana	Terrebonne Parish	Saccharum officinarum x spontaneum	sugarcane	2007-10-18	White B.
US-LA-28	SNIB00200_01	Louisiana	Saint Martin Parish	Saccharum officinarum x spontaneum	sugarcane	2016-07-01	Jacobson A.
US-LA-29	SNIB00049_01	Louisiana	Terrebonne Parish	Saccharum officinarum x spontaneum	sugarcane	2007-10-18	White B.
US-LA-30	SNIB00050_01	Louisiana	Terrebonne Parish	Saccharum officinarum x spontaneum	sugarcane	2007-10-18	White B.
US-LA-31	SNIB00112_01	Louisiana	East Baton Rouge Parish	Sorghum bicolor	grain sorghum	2014-07-30	Gravois K.
US-LA-32	SNIB00118_01	Louisiana	Iberville Parish	Sorghum halepense	Johnsongrass	2014-03-17	Gravois K.
US-LA-33	SNIB00119_01	Louisiana	Iberville Parish	Sorghum halepense	Johnsongrass	2014-07-28	Viator B.
US-LA-34	SNIB00120_01	Louisiana	Terrebonne Parish	Sorghum halepense	Johnsongrass	2014-07-28	White B.
US-LA-35	SNIB00144_01	Louisiana	Pointe Coupee Parish	Saccharum officinarum x spontaneum	sugarcane	2014-06-11
US-LA-36	SNIB00159_01	Louisiana	Iberville Parish	Saccharum officinarum x spontaneum	sugarcane	2013-2014	Kerns D.
US-LA-37	SNIB00160_01	Louisiana	Iberville Parish	Sorghum halepense	Johnsongrass	2014-01-01
US-LA-38	SNIB00161_01	Louisiana	Iberville Parish	Sorghum halepense	Johnsongrass	2014-01-01
US-LA-39	SNIB00162_01	Louisiana	Iberville Parish	Sorghum halepense	Johnsongrass	2014-01-01
US-LA-40	SNIB00163_01	Louisiana	Terrebonne Parish	Saccharum officinarum x spontaneum	sugarcane	2007-08-21	White B.
US-LA-41	SNIB00165_01	Louisiana	Concordia Parish	Sorghum bicolor	grain sorghum	2014-06-14	Williams S.
US-LA-42	SNIB00166_01	Louisiana	Rapides Parish	Sorghum halepense	Johnsongrass	2014-04-10	Kerns D.
US-LA-43	SNIB00167_01	Louisiana	Iberville Parish	Sorghum halepense	Johnsongrass	2014-03-13
US-LA-44	SNIB00168_01	Louisiana	East Baton Rouge Parish	Sorghum bicolor	grain sorghum	2014-07-30	Gravois K.
US-LA-45	SNIB00176_01	Louisiana	Iberville Parish	Saccharum officinarum x spontaneum	sugarcane	2014-07-28
US-LA-46	SNIB00199_01	Louisiana	Saint Martin Parish	Saccharum officinarum x spontaneum	sugarcane	2016-07-01	Jacobson A.
US-OK-01	SNIB00088_01	Oklahoma	Atoka County	Sorghum halepense	Johnsongrass	2014-07-15
US-OK-02	SNIB00093_01	Oklahoma	Bryan County	Sorghum bicolor	grain sorghum	2013-09-10	Armstrong J.S.
US-OK-03	SNIB00095_01	Oklahoma	Atoka County	Sorghum bicolor	grain sorghum	2014-07-15
US-OK-04	SNIB00150_01	Oklahoma	Atoka County	Sorghum bicolor	grain sorghum	2013-2014	Armstrong J.S.
US-OK-05	SNIB00184_01	Oklahoma	Bryan County	Sorghum halepense	Johnsongrass	2013-09-10	Armstrong J.S.
US-OK-06	SNIB00186_01	Oklahoma	Atoka County	Sorghum halepense	Johnsongrass	2014-07-15
US-TN-01	SNIB00151_01	Tennessee	Chester County	Sorghum bicolor	grain sorghum	2014-08-20
US-TN-02	SNIB00152_01	Tennessee	Coffee County	Sorghum bicolor	sweet sorghum	2014-09-26
US-TN-03	SNIB00171_01	Tennessee	Hardeman County	Sorghum bicolor	grain sorghum	2014-08-27
US-TN-04	SNIB00174_01	Tennessee	Madison County	Sorghum bicolor	grain sorghum	2014-08-26
US-TX-01	SNIB00074_01	Texas	Nueces County	Sorghum bicolor	grain sorghum	2014-05-20	Ahrens W.
US-TX-02	SNIB00075_01	Texas	Nueces County	Sorghum bicolor	grain sorghum	2014-06-11	Armstrong J.S.
US-TX-03	SNIB00076_01	Texas	Kleberg County	Sorghum bicolor	grain sorghum	2014-05-20	Ahrens W.
US-TX-04	SNIB00077_01	Texas	Johnson County	Sorghum	Haygrazer / Forage Sorghum	2013-11-13	Brewer M.; Anderson D.J.
US-TX-05	SNIB00078_01	Texas	McLennan County	Sorghum	Haygrazer / Forage Sorghum	2014-06-13
US-TX-06	SNIB00081_01	Texas	McLennan County	Sorghum halepense	Johnsongrass	2013-11-13	Armstrong J.S.
US-TX-07	SNIB00083_01	Texas	Jefferson County	Sorghum halepense	Johnsongrass	2014-08-10	Way M.O.
US-TX-08	SNIB00084_01	Texas	Hidalgo County	Sorghum halepense	Johnsongrass	2014-07-20	Sekula D.
US-TX-10	SNIB00087_01	Texas	Delta County	Sorghum halepense	Johnsongrass	2013-09-11	Armstrong J.S.
US-TX-11	SNIB00146_01	Texas	Hidalgo County	Saccharum officinarum x spontaneum	sugarcane	2013-2014	Sekula D.
US-TX-14	SNIB00157_01	Texas	Hidalgo County	Saccharum officinarum x spontaneum	sugarcane	2015-09-25	Villanueva R.
US-TX-15	SNIB00158_01	Texas	Hidalgo County	Saccharum officinarum x spontaneum	sugarcane	2015-09-28	Sekula D.
US-TX-17	SNIB00193_01	Texas	McLennan County	Sorghum halepense	Johnsongrass	2013-11-13	Armstrong J.S.
US-TX-18	SNIB00203_01	Texas	Matagorda County	Sorghum bicolor	grain sorghum	2013-07-19	Miller G.
